# Supplementary material for: Cross-communication between Gi and Gs in a G-protein-coupled receptor heterotetramer guided by a receptor C-terminal domain
Source: PubMed Central journal article supplement (PMC6389107; doi:10.1186/s12915-018-0491-x), 2018-02-28
Supplement: 12915_2018_491_MOESM2_ESM.pdf [file 12915_2018_491_MOESM2_ESM.pdf]

**Table S1.** List of target sequences and template structures used to construct the computer models of A<sub>1</sub>-A<sub>2A</sub>Het in complex with G<sub>i</sub> and G<sub>s</sub>.

| <b>Protein model</b>                        | <b>UniProt ID</b> | <b>PDB IDs</b>                                                                                                                               |
|---------------------------------------------|-------------------|----------------------------------------------------------------------------------------------------------------------------------------------|
| A <sub>2A</sub> R (G <sub>s</sub> -unbound) | P29274            | <b>4EIY</b> , except ICL3 (209-218: <b>2Z73</b> )                                                                                            |
| A <sub>2A</sub> R (G <sub>s</sub> -bound)   | P29274            | <b>4EIY</b> , except TMs 5-6 (179-259: <b>3SN6</b> ), ICL3 (209-218: <b>2Z73</b> ) and C-term (305-317: <b>2Z73</b> , 318-335: <b>4JQI</b> ) |
| A <sub>1</sub> R (G <sub>i</sub> -unbound)  | P30542            | (based on A <sub>2A</sub> R G <sub>s</sub> -unbound)                                                                                         |
| A <sub>1</sub> R (G <sub>i</sub> -bound)    | P30542            | (based on A <sub>2A</sub> R G <sub>s</sub> -bound)                                                                                           |
| G <sub>αs</sub>                             | P04896            | <b>3SN6</b> , except AH (56-208: <b>1AZT</b> )                                                                                               |
| G <sub>αi</sub>                             | P10824            | <b>3SN6</b> , except AH (49:186: <b>1AGR</b> )                                                                                               |
| G <sub>β</sub>                              | P54311            | <b>3SN6</b> (1-340)                                                                                                                          |
| G <sub>γ</sub>                              | P63212            | <b>3SN6</b> (5-62)                                                                                                                           |
| β-arrestin-1                                | P29066            | N-term (7-174: <b>4ZWJ</b> ), C-term (175-360: <b>4JQI</b> )                                                                                 |
| Rluc                                        | P27652            | <b>2PSD</b> (4-308)                                                                                                                          |
| YFP                                         | Q963I9            | <b>2RH7</b> (7-226)                                                                                                                          |
